# Supplementary material for: Preconcentration and determination of chromium species by cloud point extraction-flame atomic absorption spectrometry
Source: Royal Society of Chemistry journal article supplement (doi:10.1039/c4ay00922c), 2014-06-06

We did an additional experiment **to demonstrate the stabilities of Alizarin Complexone (AC) by UV-vis spectral analysis**. We supplied the Uv-vis scanning spectrum of AC before and after 90°C for 2h as Electronic Supplementary Information. The results showed that AC is unchangeable after 90°C for 2h.

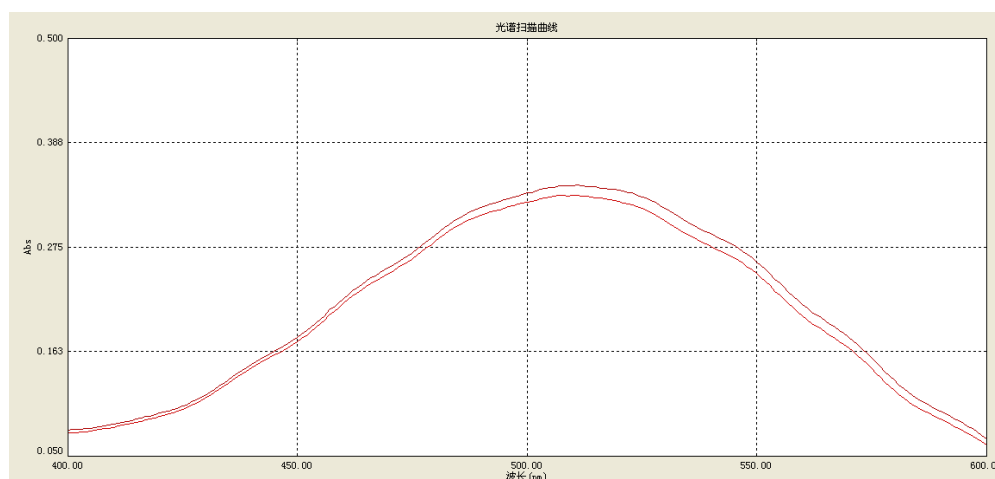

Supplement: c4ay00922c1.pdf [file c4ay00922c1.pdf]
